# Supplementary material for: Contemporary Analysis of Electronic Frailty Measurement in Older Adults with Multiple Myeloma Treated in the National US Veterans Affairs Healthcare System
Source: MDPI journal article supplement (doi:10.3390/cancers13123053), 2021-06-18
Supplement: s1 [file s1]

# Supplementary Material: Contemporary Analysis of Electronic Frailty Measurement in Older Adults with Multiple Myeloma Treated in the National US Veterans Affairs Healthcare System

Clark DuMontier, Nathanael R. Fillmore, Cenk Yildirim, David Cheng, Jennifer La, Ariela R. Orkaby, Brian Charrest, Diana Cirstea, Sarvari Yellapragada, John Michael Gaziano, Nhan Do, Mary T. Brophy, Dae H. Kim, Nikhil C. Munshi and Jane A. Driver

**Table S1.** Prevalence of VA-FI-10 health deficits for 4,924 Veterans with MM by cohort year.

| Health Deficit                                | 2012       | 2013       | 2014       | 2015       | 2016       | 2017       |
|-----------------------------------------------|------------|------------|------------|------------|------------|------------|
| <i>n</i> (%)                                  | 284 (100)  | 358 (100)  | 439 (100)  | 437 (100)  | 487 (100)  | 499 (100)  |
| Morbidity                                     |            |            |            |            |            |            |
| Atrial fibrillation                           | 49 (17.3)  | 66 (18.4)  | 77 (17.5)  | 84 (19.2)  | 94 (19.3)  | 91 (18.2)  |
| Anemia                                        | 195 (68.7) | 249 (69.6) | 313 (71.3) | 308 (70.5) | 353 (72.5) | 332 (66.5) |
| Coronary Artery Disease                       | 102 (35.9) | 137 (38.3) | 178 (40.5) | 159 (36.4) | 187 (38.4) | 186 (37.3) |
| Cancer                                        | 276 (97.2) | 348 (97.2) | 429 (97.7) | 424 (97.0) | 476 (97.7) | 485 (97.2) |
| Cerebral Vascular Disease                     | 52 (18.3)  | 63 (17.6)  | 81 (18.5)  | 73 (16.7)  | 78 (16.0)  | 99 (19.8)  |
| Chronic Kidney Disease                        | 115 (40.5) | 167 (46.6) | 195 (44.4) | 177 (40.5) | 215 (44.1) | 216 (43.3) |
| Diabetes                                      | 127 (44.7) | 149 (41.6) | 200 (45.6) | 177 (40.5) | 216 (44.4) | 234 (46.9) |
| Heart Failure                                 | 65 (22.9)  | 87 (24.3)  | 99 (22.6)  | 89 (20.4)  | 98 (20.1)  | 102 (20.4) |
| Hypertension                                  | 247 (87.0) | 323 (90.2) | 394 (89.7) | 377 (86.3) | 422 (86.7) | 444 (89.0) |
| Liver Disease                                 | 23 (8.1)   | 35 (9.8)   | 51 (11.6)  | 50 (11.4)  | 52 (10.7)  | 50 (10.0)  |
| Lung Disease                                  | 92 (32.4)  | 115 (32.1) | 156 (35.5) | 151 (34.6) | 175 (35.9) | 180 (36.1) |
| Thyroid Disease                               | 42 (14.8)  | 43 (12.0)  | 66 (15.0)  | 51 (11.7)  | 73 (15.0)  | 78 (15.6)  |
| Osteoporosis or osteoporosis-related fracture | 41 (14.4)  | 57 (15.9)  | 62 (14.1)  | 78 (17.8)  | 62 (12.7)  | 58 (11.6)  |
| Incontinence                                  | 30 (10.6)  | 26 (7.3)   | 35 (8.0)   | 31 (7.1)   | 36 (7.4)   | 45 (9.0)   |
| Function                                      |            |            |            |            |            |            |
| Arthritis                                     | 172 (60.6) | 197 (55.0) | 247 (56.3) | 240 (54.9) | 257 (52.8) | 256 (51.3) |
| Durable Medical Equipment                     | 59 (20.8)  | 82 (22.9)  | 96 (21.9)  | 100 (22.9) | 143 (29.4) | 175 (35.1) |
| Falls                                         | 27 (9.5)   | 35 (9.8)   | 52 (11.8)  | 46 (10.5)  | 40 (8.2)   | 58 (11.6)  |
| Fatigue                                       | 49 (17.3)  | 67 (18.7)  | 123 (28.0) | 108 (24.7) | 122 (25.1) | 153 (30.7) |
| Gait Abnormality                              | 60 (21.1)  | 73 (20.4)  | 107 (24.4) | 101 (23.1) | 112 (23.0) | 126 (25.3) |
| Muscular impairment/debility                  | 67 (23.6)  | 90 (25.1)  | 105 (23.9) | 91 (20.8)  | 82 (16.8)  | 96 (19.2)  |
| Parkinson's Disease                           | 12 (4.2)   | 11 (3.1)   | 15 (3.4)   | 13 (3.0)   | 15 (3.1)   | 15 (3.0)   |
| Peripheral Vascular Disease/Claudication      | 85 (29.9)  | 103 (28.8) | 118 (26.9) | 126 (28.8) | 122 (25.1) | 136 (27.3) |
| Cognition and Mood                            |            |            |            |            |            |            |
| Dementia                                      | 42 (14.8)  | 40 (11.2)  | 63 (14.4)  | 50 (11.4)  | 71 (14.6)  | 85 (17.0)  |
| Anxiety                                       | 29 (10.2)  | 48 (13.4)  | 72 (16.4)  | 60 (13.7)  | 88 (18.1)  | 82 (16.4)  |
| Depression                                    | 71 (25.0)  | 94 (26.3)  | 139 (31.7) | 107 (24.5) | 139 (28.5) | 156 (31.3) |
| Sensory Loss                                  |            |            |            |            |            |            |
| Peripheral Neuropathy                         | 29 (10.2)  | 36 (10.1)  | 52 (11.8)  | 47 (10.8)  | 79 (16.2)  | 120 (24.0) |
| Hearing Impairment                            | 100 (35.2) | 120 (33.5) | 160 (36.4) | 163 (37.3) | 183 (37.6) | 213 (42.7) |
| Vision Impairment                             | 96 (33.8)  | 105 (29.3) | 132 (30.1) | 141 (32.3) | 146 (30.0) | 136 (27.3) |
| Other                                         |            |            |            |            |            |            |
| Chronic pain                                  | 70 (24.6)  | 100 (27.9) | 122 (27.8) | 146 (33.4) | 157 (32.2) | 146 (29.3) |
| Failure to Thrive                             | 9 (3.2)    | 7 (2.0)    | 7 (1.6)    | 10 (2.3)   | 9 (1.8)    | 14 (2.8)   |
| Weight loss                                   | 32 (11.3)  | 50 (14.0)  | 58 (13.2)  | 58 (13.3)  | 55 (11.3)  | 63 (12.6)  |

**Table S2.** Adjusted effect estimates for all variables included in multivariable Cox proportional hazards regression models estimating the association of VA-FI-10 with overall mortality and time to hospitalization.

| Variable              | Mortality HR | 95% CI Lower Bound | 95% CI Upper Bound | Hospitalization HR | 95% CI Lower Bound | 95% CI Upper Bound |
|-----------------------|--------------|--------------------|--------------------|--------------------|--------------------|--------------------|
| Pre-frail             | 1.254        | 1.035              | 1.520              | 1.315              | 1.084              | 1.597              |
| Mildly frail          | 1.539        | 1.273              | 1.861              | 1.584              | 1.307              | 1.919              |
| Moderately frail      | 1.954        | 1.610              | 2.370              | 1.690              | 1.388              | 2.056              |
| Severely frail        | 2.497        | 2.050              | 3.040              | 1.931              | 1.578              | 2.361              |
| Age at Tx Initiation  | 1.030        | 1.025              | 1.037              | 0.986              | 0.980              | 0.991              |
| Year of Tx Initiation | 0.968        | 0.959              | 0.976              | 1.021              | 1.012              | 1.030              |
| Black Race            | 0.890        | 0.821              | 0.965              | 1.123              | 1.036              | 1.219              |
| Other Race            | 1.105        | 0.807              | 1.513              | 1.038              | 0.763              | 1.413              |
| Gender = M            | 1.234        | 0.916              | 1.660              | 0.920              | 0.676              | 1.251              |
| Income ≥ \$15,000     | 0.839        | 0.770              | 0.913              | 0.828              | 0.757              | 0.904              |
| Income Missing        | 0.909        | 0.801              | 1.033              | 0.555              | 0.477              | 0.647              |
| ISS Stage 2           | 1.172        | 1.061              | 1.294              | 1.102              | 0.989              | 1.229              |
| ISS Stage 3           | 1.223        | 1.068              | 1.399              | 1.102              | 0.933              | 1.301              |
| Creatinine > 2        | 1.201        | 1.094              | 1.319              | 1.202              | 1.058              | 1.365              |
| Calcium ≥ 11          | 1.317        | 1.087              | 1.594              | 1.420              | 1.175              | 1.718              |
| Hemoglobin < 10       | 1.324        | 1.221              | 1.436              | 1.384              | 1.279              | 1.498              |
| Platelet < 150        | 1.188        | 1.099              | 1.285              | 1.029              | 0.949              | 1.117              |

**Table S3.** Complete case analysis involving multivariable Cox proportional hazards regression models estimating the association of VA-FI-10 with overall mortality and hospitalizations.

| VA-FI-10 Severity | Mortality HR (95% CI) | Hospitalization HR (95% CI) |
|-------------------|-----------------------|-----------------------------|
| Nonfrail          | Reference             | Reference                   |
| Pre-frail         | 1.26 (0.89 to 1.78)   | 1.24 (0.92 to 1.67)         |
| Mildly frail      | 1.62 (1.15 to 2.27)   | 1.53 (1.14 to 2.05)         |
| Moderately frail  | 2.12 (1.50 to 3.00)   | 1.85 (1.37 to 2.50)         |
| Severely frail    | 2.44 (1.71 to 3.49)   | 1.99 (1.45 to 2.72)         |

All adjusted analyses were on imputed data. Models were adjusted for all covariates, including age at MM diagnosis, gender, race, income, year of treatment initiation, ISS stage, calcium greater than or equal to 11 mg/dL, creatinine greater than 2 mg/dL, hemoglobin less than 10 g/dL, and platelets less than 150,000/ $\mu$ L. HR = Hazard ratio, CI = Confidence interval.

**Table S4.** Sensitivity analysis in years 2012–2017, repeating multivariable Cox proportional hazards regression models for mortality and hospitalizations to assess whether associations with VA-FI-10 hold in the later time period of the study during which a higher proportion of patients were receiving modern-era treatments.

| Variable         | Mortality HR | 95% CI Lower Bound | 95% CI Upper Bound | Hospitalization HR | 95% CI Lower Bound | 95% CI Upper Bound |
|------------------|--------------|--------------------|--------------------|--------------------|--------------------|--------------------|
| Pre-frail        | 1.413        | 1.007              | 1.984              | 1.254              | 0.961              | 1.636              |
| Mildly frail     | 1.732        | 1.239              | 2.421              | 1.645              | 1.265              | 2.140              |
| Moderately frail | 2.340        | 1.670              | 3.277              | 1.944              | 1.486              | 2.547              |
| Severely frail   | 2.889        | 2.052              | 4.067              | 2.344              | 1.782              | 3.080              |

All adjusted analyses were on imputed data. Models were adjusted for all covariates, including age at MM diagnosis, gender, race, income, year of treatment initiation, ISS stage, calcium greater than or equal to 11 mg/dL, creatinine greater than 2 mg/dL, hemoglobin less than 10 g/dL, and platelets less than 150,000/microL. HR = Hazard ratio, CI = Confidence interval.

**Table S5.** Multivariable Cox proportional hazards regression models estimating the association of VA-FI-10 with overall mortality and hospitalizations, using data only from VA Corporate Data Warehouse (CDW) to measure health deficits in VA-FI-10.

| VA-FI-10 Severity | Mortality HR (95% CI) | Hospitalization HR (95% CI) |
|-------------------|-----------------------|-----------------------------|
| Nonfrail          | Reference             | Reference                   |
| Pre-frail         | 1.20 (1.05 to 1.38)   | 1.65 (1.40 to 1.94)         |
| Mildly frail      | 1.55 (1.35 to 1.77)   | 2.32 (1.97 to 2.74)         |
| Moderately frail  | 2.20 (1.90 to 2.55)   | 3.21 (2.70 to 3.81)         |
| Severely frail    | 2.66 (2.26 to 3.12)   | 3.96 (3.29 to 4.76)         |

All adjusted analyses were on imputed data. Models were adjusted for all covariates, including age at MM diagnosis, gender, race, income, year of treatment initiation, ISS stage, calcium greater than or equal to 11 mg/dL, creatinine greater than 2 mg/dL, hemoglobin less than 10 g/dL, and platelets less than 150,000/ $\mu$ L. HR = Hazard ratio, CI = Confidence interval.

**Table S6.** Multivariable Cox proportional hazards regression models estimating the association of VA-FI-10 with overall mortality and hospitalizations, using data from VA Corporate Data Warehouse (CDW) and Centers for Medicare and Medicaid Services (CMS) and 1-year assessment period to measure health deficits in VA-FI-10.

| VA-FI-10 Severity | Mortality HR (95% CI) | Hospitalization HR (95% CI) |
|-------------------|-----------------------|-----------------------------|
| Nonfrail          | Reference             | Reference                   |
| Pre-frail         | 1.24 (1.09 to 1.4)    | 1.33 (1.76 to 1.51)         |
| Mildly frail      | 1.49 (1.31 to 1.69)   | 1.54 (1.35 to 1.76)         |
| Moderately frail  | 2.13 (1.85 to 2.45)   | 1.85 (1.60 to 2.15)         |
| Severely frail    | 2.75 (2.34 to 3.23)   | 2.11 (1.78 to 2.50)         |

All adjusted analyses were on imputed data. Models were adjusted for all covariates, including age at MM diagnosis, gender, race, income, year of treatment initiation, ISS stage, calcium greater than or equal to 11 mg/dL, creatinine greater than 2 mg/dL, hemoglobin less than 10 g/dL, and platelets less than 150,000/ $\mu$ L. HR = Hazard ratio, CI = Confidence interval.

**Publisher's Note:** MDPI stays neutral with regard to jurisdictional claims in published maps and institutional affiliations.

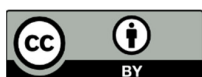

© 2021 by the authors. Licensee MDPI, Basel, Switzerland. This article is an open access article distributed under the terms and conditions of the Creative Commons Attribution (CC BY) license (<http://creativecommons.org/licenses/by/4.0/>).
